# Supplementary material
Source: PubMed Central journal article supplement (PMC3266181)
Supplement: cc1020_3527SD1.pdf [file cc1020_3527SD1.pdf]

## **Supplemental Information**

### **Generation of a set of conditional analog-sensitive alleles of essential protein kinases in the fission yeast *Schizosaccharomyces pombe***

Lubos Cipak, Chao Zhang, Ines Kovacicova, Cornelia Rumpf, Eva Miadokova, Kevan M. Shokat and Juraj Gregan

## Supplemental Figure Legends

**Figure S1.** Growth, cellular morphology and FACS analysis of analog-sensitive protein kinases.

Cells were grown in liquid YES medium supplemented with ATP analog or DMSO at 32 °C, with the exception of the temperature-sensitive mutants, *cdc2-as1* and *pat1-as2* which were grown at 25 °C. At the indicated time point the number of cells was determined. Four hours after adding the inhibitor/DMSO, cells were harvested and the morphology of the cells was analyzed by microscopy and the cellular DNA content by flow cytometry.

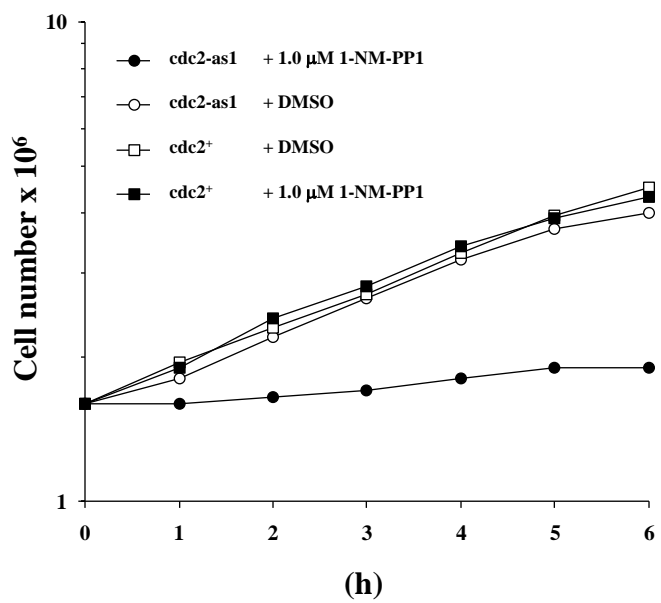

+ DMSO

+ 1.0  $\mu\text{M}$  1-NM-PP1  
4 h incubation

*cdc2-as1*

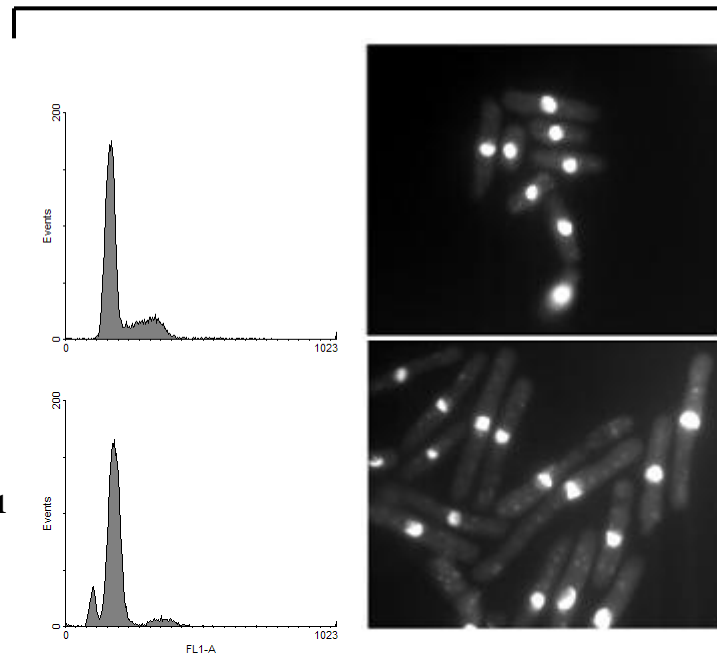

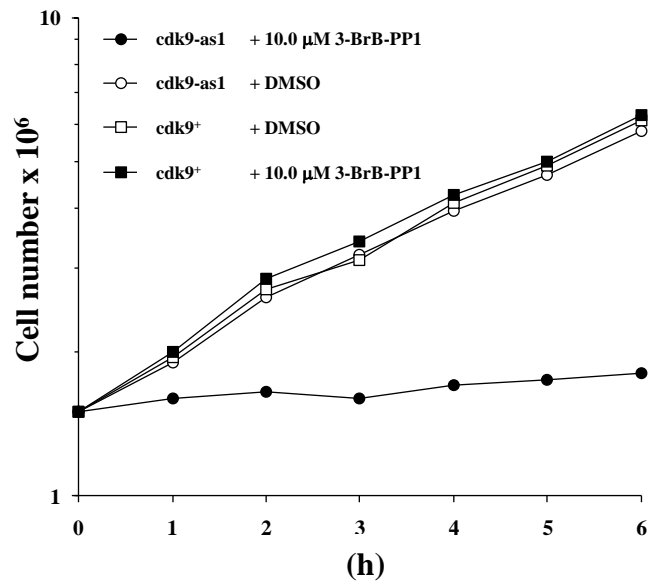

+ 10.0  $\mu$ M 3-BrB-PP1  
4 h incubation

+ DMSO

cdk9-as1

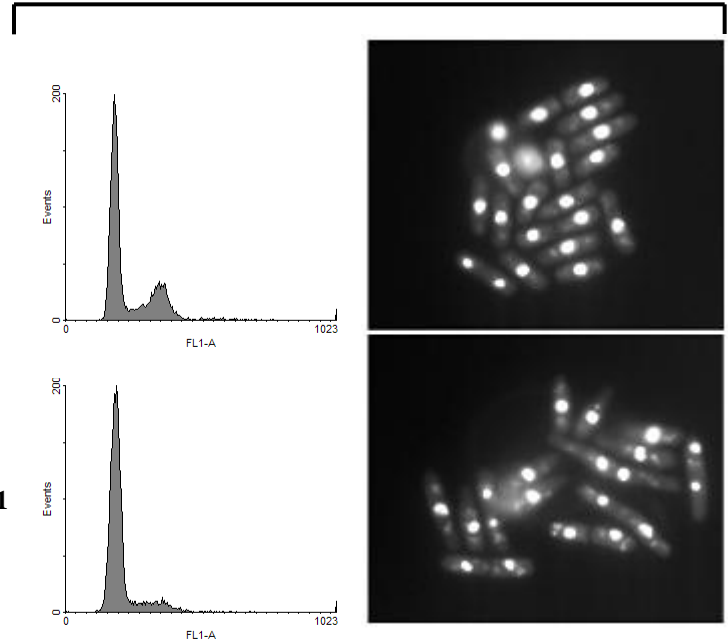

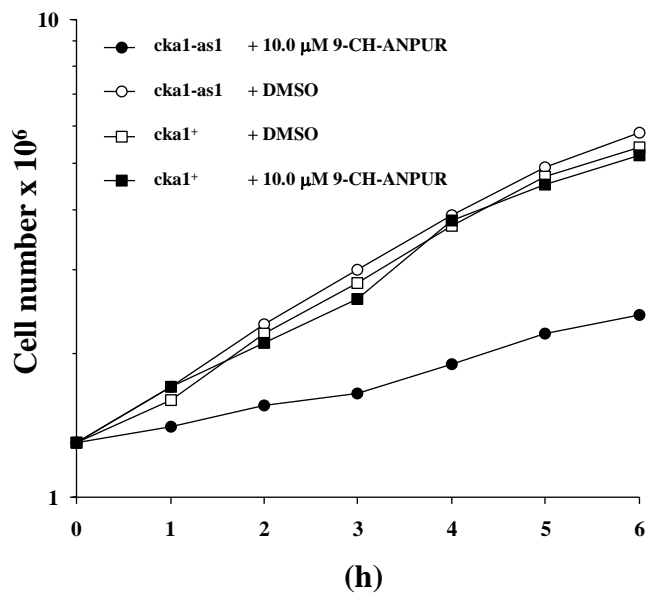

+ 10.0  $\mu$ M 9-CH-ANPUR  
4 h incubation

+ DMSO

*cka1-as1*

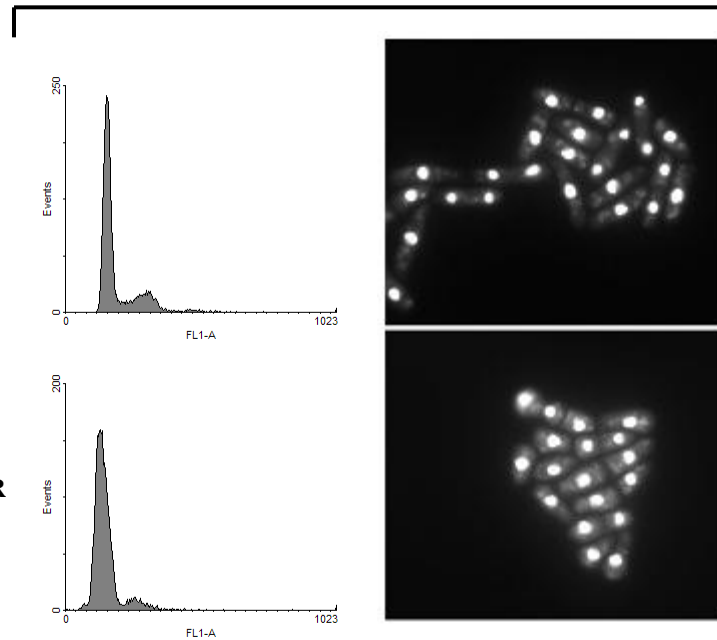

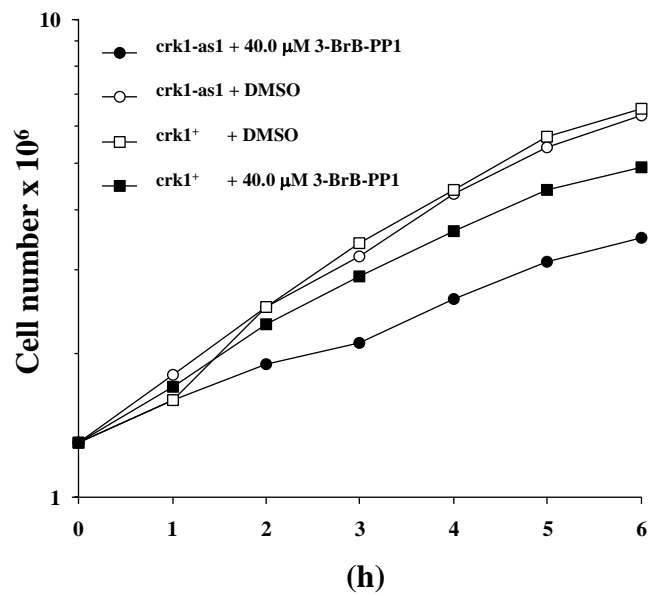

+ DMSO

+ 40.0 μM 3-BrB-PP1  
4 h incubation

crk1-as1

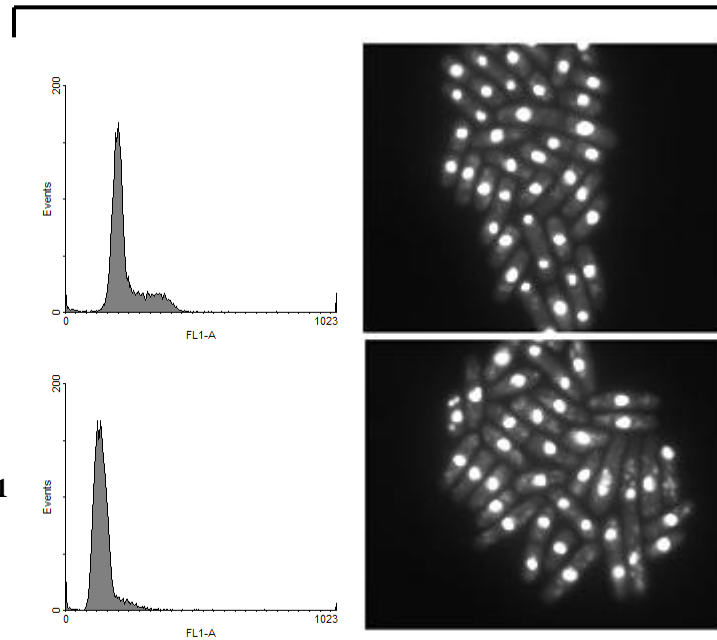

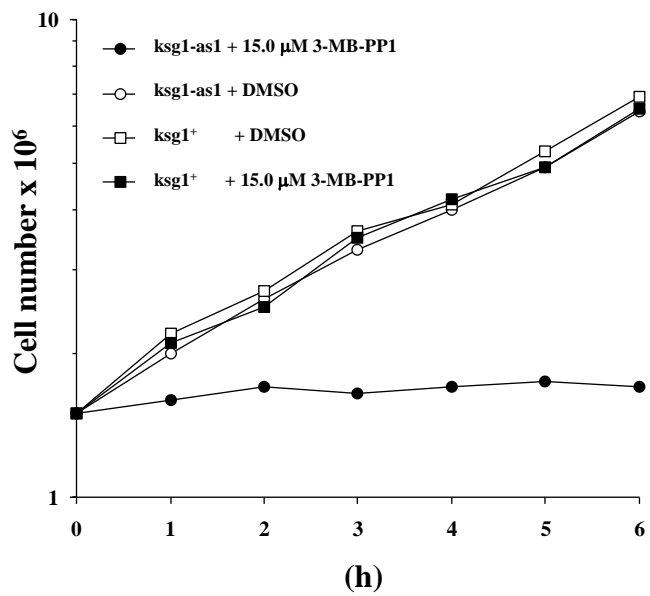

+ DMSO

+ 15.0  $\mu M$  3-MB-PP1  
4 h incubation

$ksg1-as1$

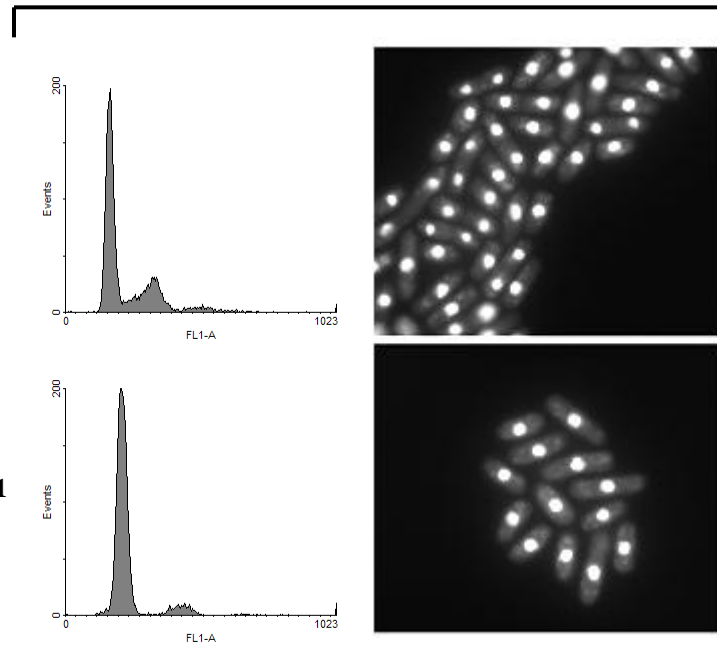

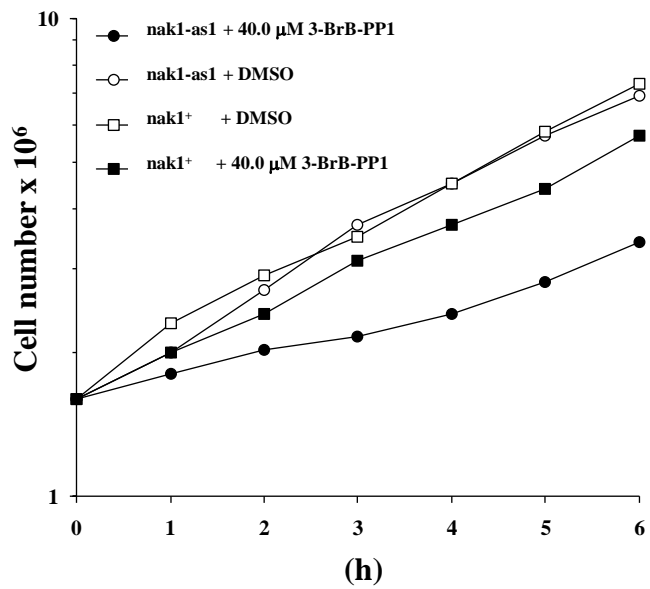

+ DMSO

+ 40.0 μM 3-BrB-PP1  
4 h incubation

nak1-as1

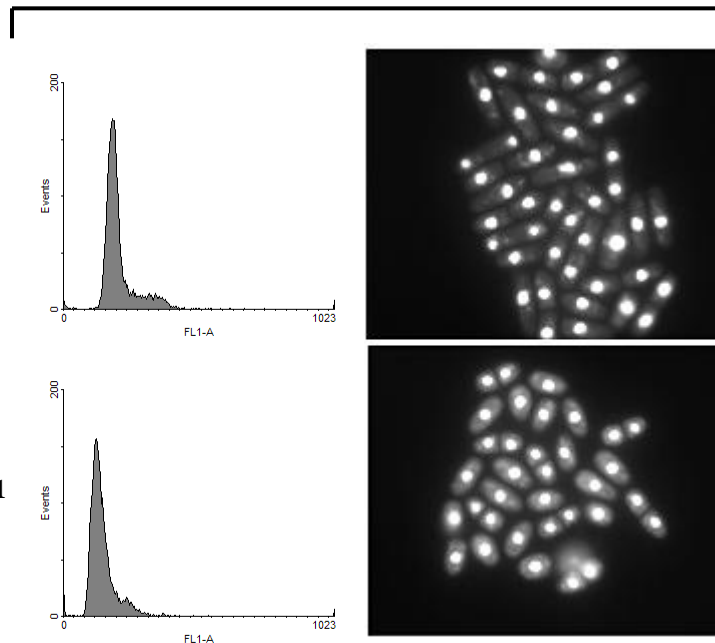



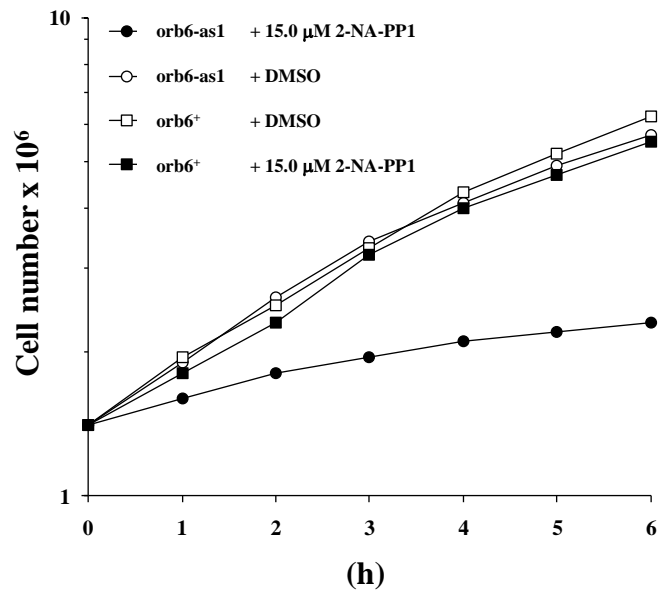

+ 15.0 μM 2-NA-PP1  
4 h incubation

+ DMSO

orb6-as1

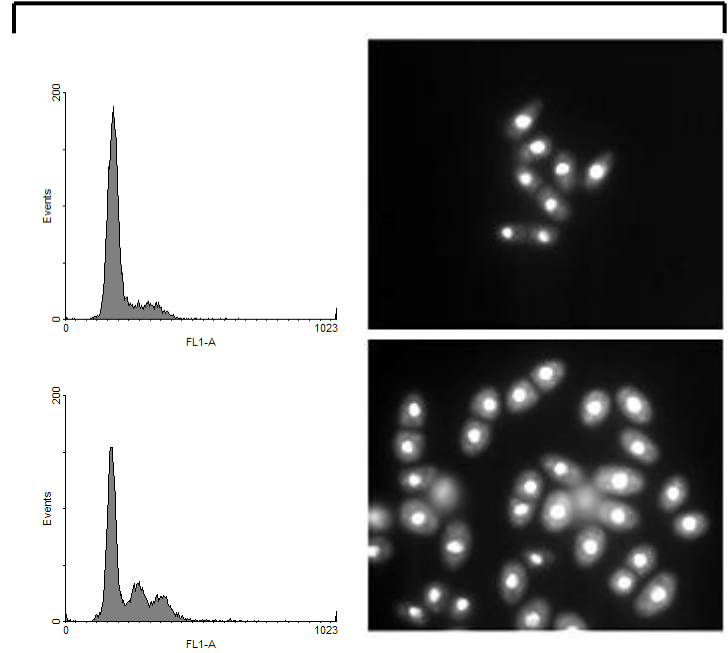

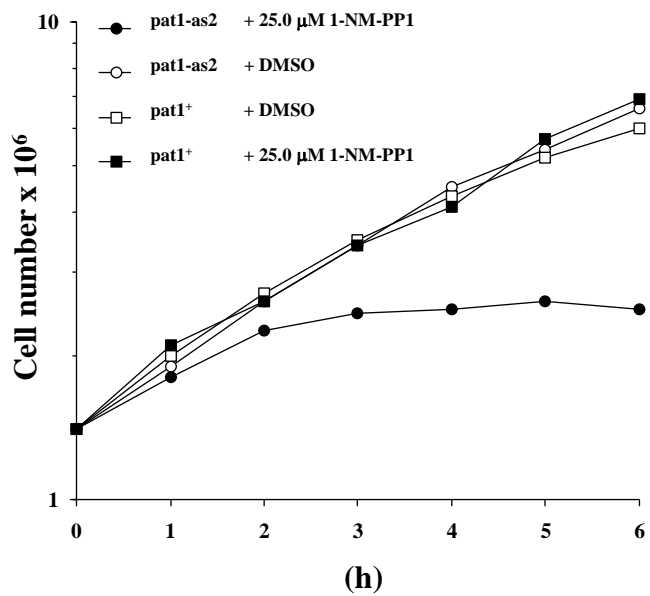

+ DMSO

+ 25.0 μM 1-NM-PP1  
4 h incubation

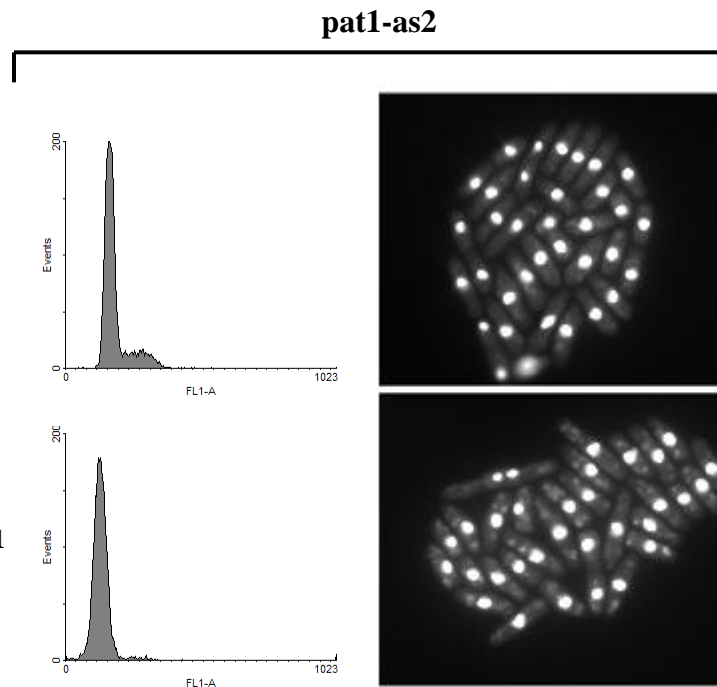

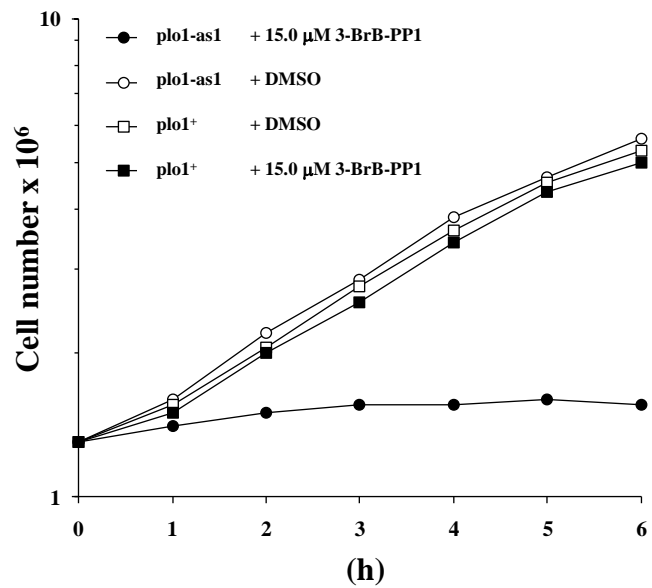

+ DMSO

+ 15.0  $\mu\text{M}$  3-BrB-PP1  
4 h incubation

plo1-as1

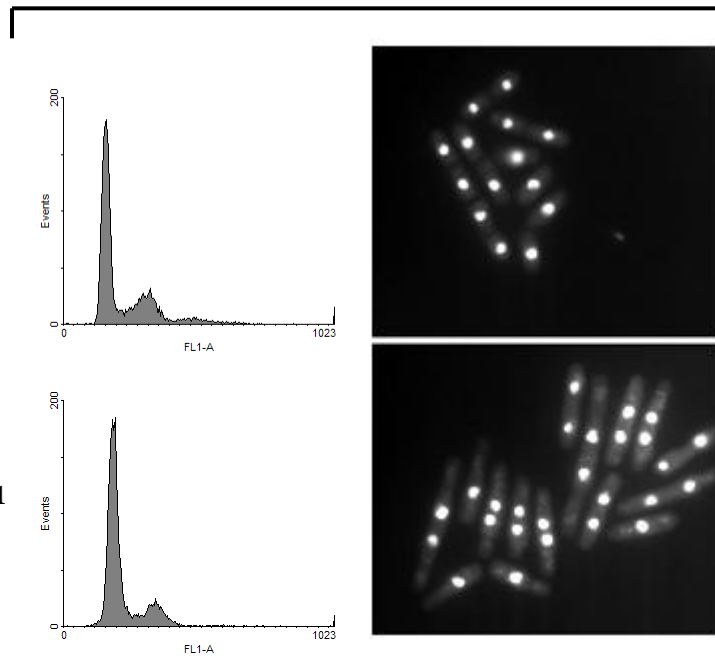

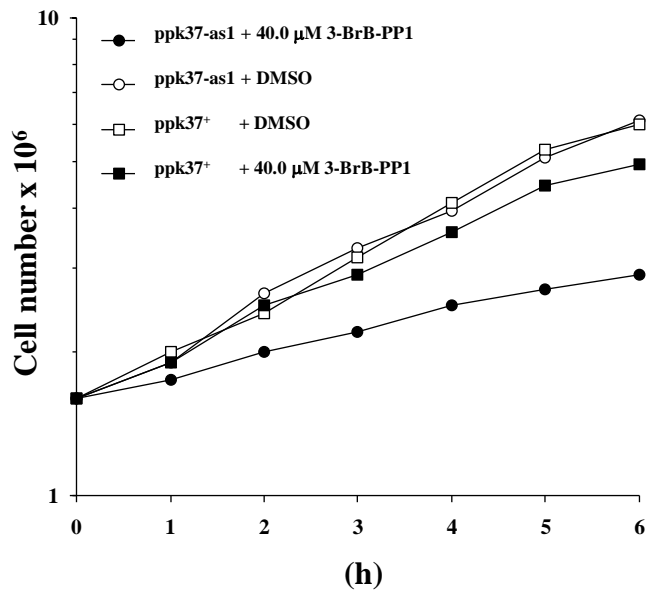

+ 40.0 μM 3-BrB-PP1  
4 h incubation

+ DMSO

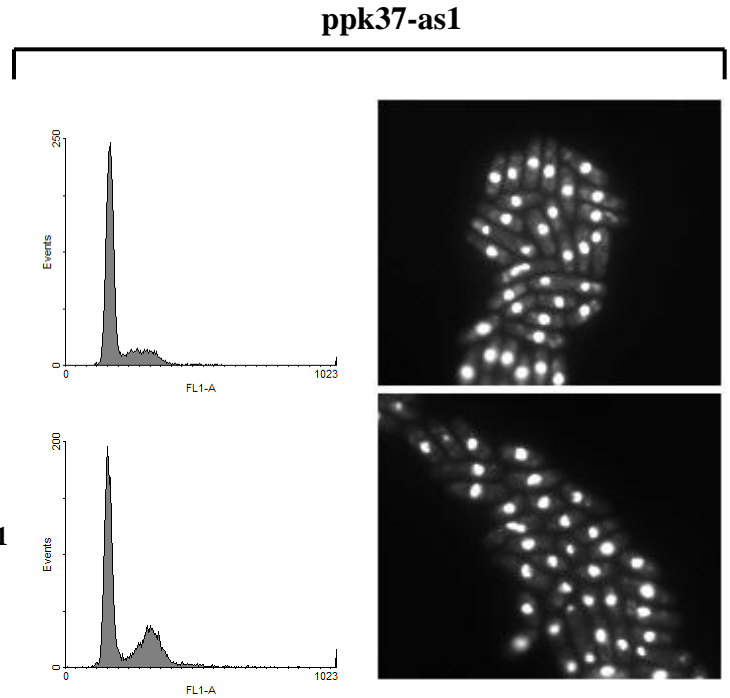

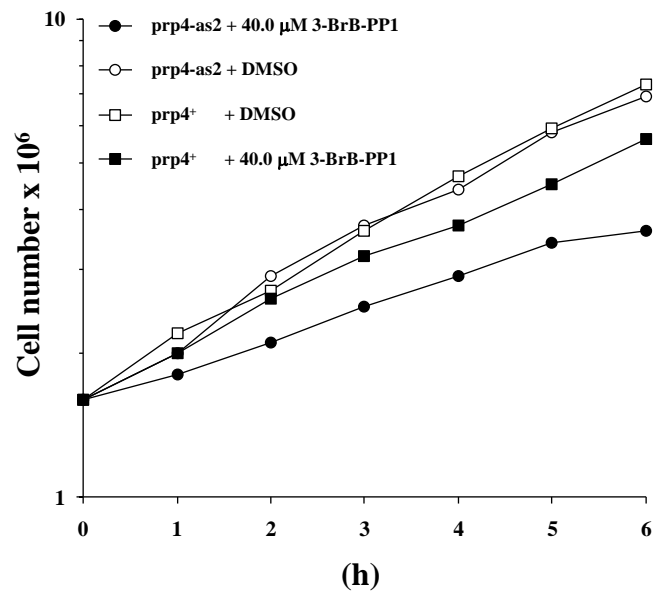

+ 40.0 μM 3-BrB-PP1  
4 h incubation

+ DMSO

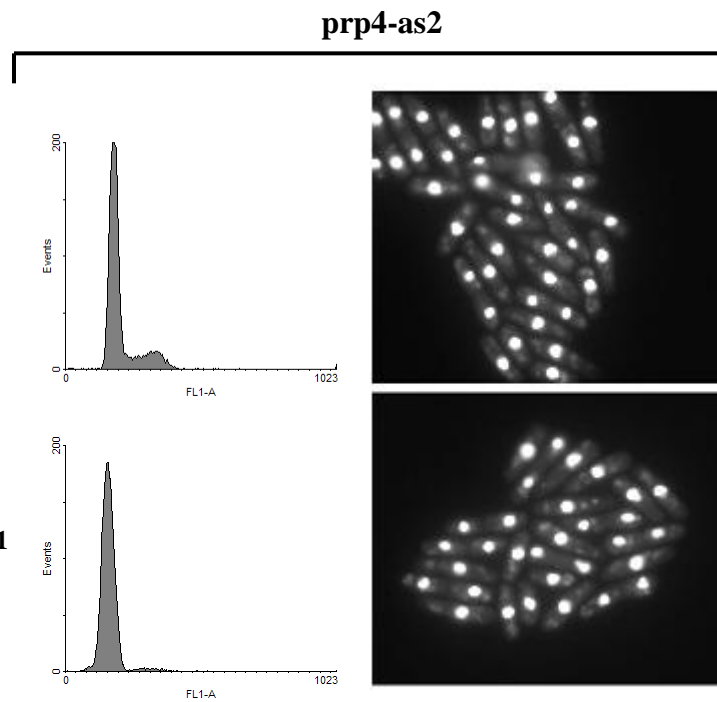

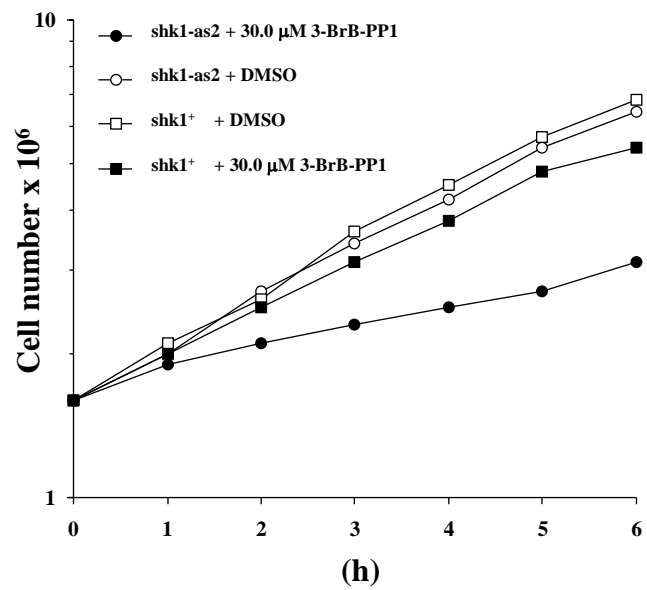

+ DMSO

+ 30.0 μM 3-BrB-PP1  
4 h incubation

shk1-as2

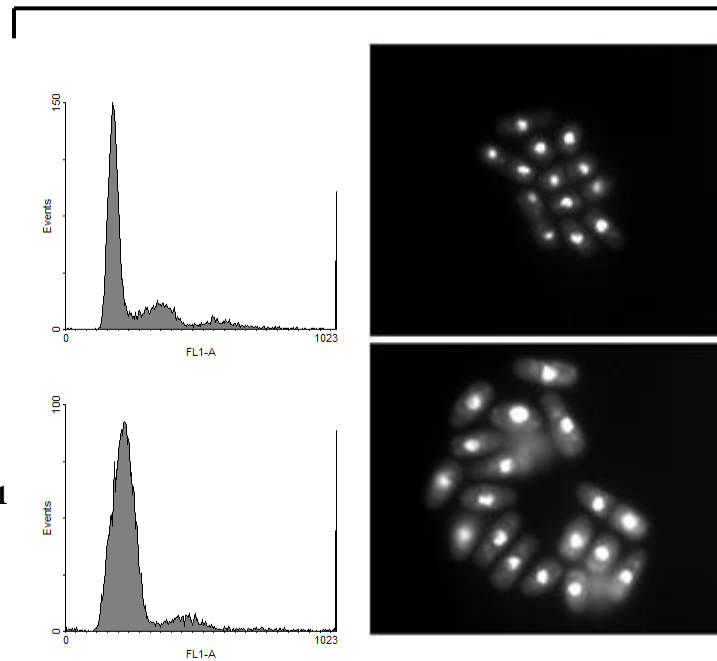

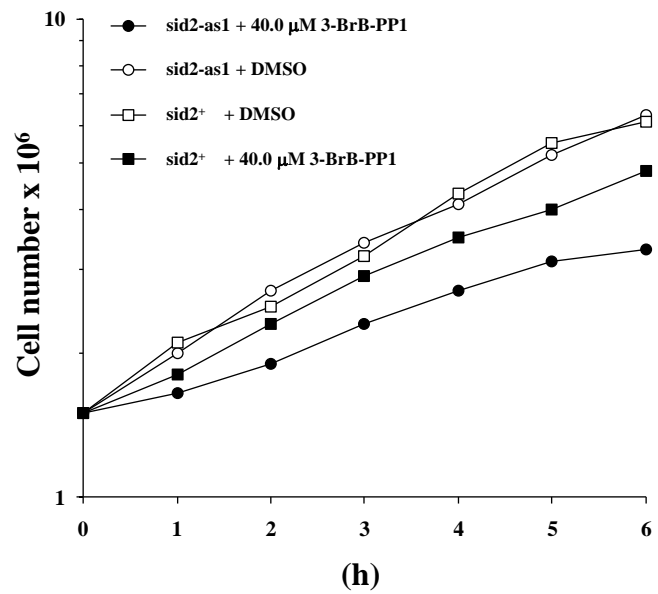

+ DMSO

+ 40.0  $\mu\text{M}$  3-BrB-PP1  
4 h incubation

*sid2-as1*

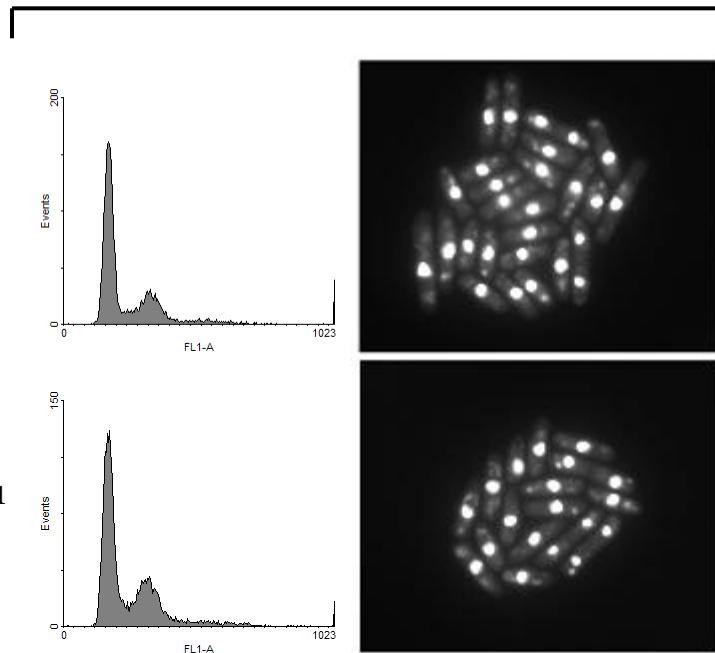

**Table S1.** Primers used for deletion of essential kinases.

---

|             |            |                                           |
|-------------|------------|-------------------------------------------|
| <i>cdc2</i> | up-out     | 5'-aaaatctagacacctgtgtgtacacgggatagttc-3' |
|             | up-in      | 5'-aaaactcgagtgcttatgttgtgtgtgctgtggg-3'  |
|             | down-out   | 5'-aaaatctagagaacggcgataattcccttgacag-3'  |
|             | down-in    | 5'-aaaaagatctcaacaatgggcaatttacagggc-3'   |
|             | up-check   | 5'-ggaggtaatgactttgcaatga-3'              |
|             | down-check | 5'-tggttctcctgcgctgttt-3'                 |

---

|             |            |                                           |
|-------------|------------|-------------------------------------------|
| <i>cdc7</i> | up-out     | 5'-aaaatctagatgggtacggaaactggattgttc-3'   |
|             | up-in      | 5'-aaaactcgagcgatgtagcatttgctgcgtttg-3'   |
|             | down-out   | 5'-aaaatctagaatcgcgtcctccatatacaaaagcc-3' |
|             | down-in    | 5'-aaaaagatctcgcattcccagtgacagac-3'       |
|             | up-check   | 5'-atcgccgctgttgatag-3'                   |
|             | down-check | 5'-ttaaagcatcgcgtcctcc-3'                 |

---

|             |            |                                       |
|-------------|------------|---------------------------------------|
| <i>cdk9</i> | up-out     | 5'-aaaatctagacaccagggtcggttgagttc-3'  |
|             | up-in      | 5'-aaaactcgagccgatcgatgcgcgaaatg-3'   |
|             | down-out   | 5'-aaaatctagaggtgggagagggtggtcaag-3'  |
|             | down-in    | 5'-aaaaagatctaataggcctttccgcgtgatg-3' |
|             | up-check   | 5'-cccgatttggtggtcattca-3'            |
|             | down-check | 5'-ccatgtgcttcgacattccc-3'            |

---

|             |          |                                              |
|-------------|----------|----------------------------------------------|
| <i>cka1</i> | up-out   | 5'-aaaatctagagcgacaattttaacgcctccagg-3'      |
|             | up-in    | 5'-aaaactcgagtgtccctctatgttaataatgcaaatcc-3' |
|             | down-out | 5'-aaaatctagattcattccatcgcttcttagattgc-3'    |
|             | down-in  | 5'-aaaaagatctcggacagcctttcattactagtccc-3'    |

---



up-check 5'-tttcgactgggaaagatgtgtct-3'

down-check 5'-cagctcgcaagattaacgc-3'

---

*crk1* up-out 5'-aaaatctagagggtccttcgaccattcctgc-3'

up-in 5'-aaaactcgagcaaaaacacacaaacaattccagcaag-3'

down-out 5'-aaaatctagagaggggcagcaacacgcttc-3'

down-in 5'-aaaaagatctttggaatgatgtgactgtatgcgg-3'

up-check 5'-cgaaagtgaacgtgctgcaa-3'

down-check 5'-tcaaaggaaggcactcacgg-3'

---

*hsk1* up-out 5'-aaaatctagatggcgcatgtatcatttcaagg-3'

up-in 5'-aaaactcgagtgctgccaaggaaggaacc-3'

down-out 5'-aaaatctagaatcaagcaagctggtggtgctc-3'

down-in 5'-aaaaagatctgctggcaatttctcatcaagcaatc-3'

up-check 5'-tgagcgtgccacgtaaaagc-3'

down-check 5'-ggcgaagaaacgagatgcct-3'

---

*ksg1* up-out 5'-aaaatctagagaattccacaccegaaggaatgc-3'

up-in 5'-aaaaaagcttgcaatgtcatcaaaagaaaattgcac-3'

down-out 5'-aaaatctagagctgttgaagaatgggttccg-3'

down-in 5'-aaaaggatcctgaacacttccatccatccctc-3'

up-check 5'-ttcccgatattcagctacga-3'

down-check 5'-tctgctcgaggcaggaaag-3'

---

*nak1* up-out 5'-aaaatctagacaccagacaacctgcatactcgg-3'

up-in 5'-aaaactcgagtgctggtgtagcgggtacg-3'

down-out 5'-aaaatctagatcgacgggttgatgctttgg-3'

down-in 5'-aaaagatcttgcccacggttaaggaatagagtcg-3'

up-check 5'-ccatgcaagatgagcagcaa-3'

down-check 5'-cccaacattttccctccgaa-3'

---

***orb6*** up-out 5'-aaaatctagaggcaaacgcgcatttaaaca-3'

up-in 5'-aaaactcgagtgaaagaaatggtgcaataaatgga-3'

down-out 5'-aaaatctagaagccaatgcaccatctgtcg-3'

down-in 5'-aaaagatcttttgttcattgtcctttgagcatc-3'

up-check 5'-tcaaccagatttgccgatgg-3'

down-check 5'-cgctctcggttgagcaaga-3'

---

***pat1*** up-out 5'-aaaatctagacgcaagcgttgattgtcgat-3'

up-in 5'-aaaactcgaggtccaattgatggcgaaaa-3'

down-out 5'-aaaatctagattcgtattccaaaagcttagttgc-3'

down-in 5'-aaaagatcttcgtaccgcacgttgttt-3'

up-check 5'-tccccagtccaactttcca-3'

down-check 5'-cgacctagtccaactttctatgcc-3'

---

***plol*** up-out 5'-aaaatctagacgcggttgagaaatcgatggg-3'

up-in 5'-aaaactcgagaacgcaggtgtaactttgaggg-3'

down-out 5'-aaaatctagatgttctgctatttgattcaactg-3'

down-in 5'-aaaagatctaacgcaggagctcttgacgaataag-3'

up-check 5'-gtccaccacatcgtttcca-3'

down-check 5'-cgattccgaagcactactggg-3'

---

***ppk37*** up-out 5'-aaaatctagaccgtcctcccctacttg-3'

up-in 5'-aaaactcgagtggatgtagatggacggcg-3'

down-out 5'-aaaatctagacggggcggattcatcgttaag-3'  
down-in 5'-aaaaagatcttgatgtgtttgtgccctttgc-3'  
up-check 5'-gcgttaacgaggagcaatcg-3'  
down-check 5'-ttttgcgggttagctcgg-3'

---

*prp4* up-out 5'-aaaatctagaatcagcattgcgaatctatcattgcc-3'  
up-in 5'-aaaactcgagtgttcaatgcctgatgaaaag-3'  
down-out 5'-aaaatctagatggtgccgctatgtgtacagg-3'  
down-in 5'-aaaaagatctacgcccaactggtttgtttgac-3'  
up-check 5'-ctatggtggcaggtcgcac-3'  
down-check 5'-tgcacaggtgccgagttt-3'

---

*shk1* up-out 5'-aaaatctagaagggcaattccaaaagaactgc-3'  
up-in 5'-aaaaaagcttaagaggcgcaaagggcacag-3'  
down-out 5'-aaaatctagagcaggcgttctacttgagattcc-3'  
down-in 5'-aaaaggatcctccatatccgcaggtgggc-3'  
up-check 5'-tgcgatacgatgtatttgacca-3'  
down-check 5'-tgtgaaatattccagcaggcg-3'

---

*sid1* up-out 5'-aaaagctagcagctccttgaccaaaccga-3'  
up-in 5'-aaaactcgaggcacaagctagatgcaccacg-3'  
down-out 5'-aaaagctagcgcctgcctggtgtgatcgta-3'  
down-in 5'-aaaaagatctcaacctgtttacagcattcaca-3'  
up-check 5'-catgaaatggatgattgggca-3'  
down-check 5'-agcgaaaaagaaatgccgga-3'

---

*sid2* up-out 5'-aaaatctagaatcgtaagtttggcgacacc-3'

up-in            5'-aaaactcgagaacatccaacgttttggcccc-3'  
down-out        5'-aaaatctagagaatgttacagctcttctgctgttgcc-3'  
down-in         5'-aaaagatctcgaagatactgagcttcgctttgatg-3'  
up-check        5'-cattcgcgaaagtaccgca-3'  
down-check     5'-cctgttcgctcaatccttg-3'

---

***Unique primers to confirm deletion:***

upch-uni            5'-gtcgttagaacgcggctaca-3'  
dwch-uni            5'-tctgggcctccatgctgctgg-3'

---

*Note:* restriction sites used for cloning are underlined.

**Table S2.** Plasmids used in this study.

---

|      |                                                  |
|------|--------------------------------------------------|
| p100 | <i>pCloneNat1-<math>\Delta</math>cdc2 (XbaI)</i> |
| p101 | <i>pCloneHyg1-cdc2-wt (BclI)</i>                 |
| p102 | <i>pCloneHyg1-cdc2-as1 (F84G, BclI)</i>          |

---

|      |                                                  |
|------|--------------------------------------------------|
| p103 | <i>pCloneNat1-<math>\Delta</math>cdc7 (XbaI)</i> |
| p104 | <i>pCloneHyg1-cdc7-wt (NheI)</i>                 |
| p105 | <i>pCloneHyg1-cdc7-as1 (L85G, NheI)</i>          |
| p106 | <i>pCloneHyg1-cdc7-as2 (L85A, NheI)</i>          |

---

|      |                                                  |
|------|--------------------------------------------------|
| p107 | <i>pCloneNat1-<math>\Delta</math>cdk9 (XbaI)</i> |
| p108 | <i>pCloneHyg1-cdk9-wt (StuI)</i>                 |
| p109 | <i>pCloneHyg1-cdk9-as1 (T120G, StuI)</i>         |

---

|      |                                                  |
|------|--------------------------------------------------|
| p110 | <i>pCloneNat1-<math>\Delta</math>cka1 (XbaI)</i> |
| p111 | <i>pCloneHyg1-cka1-wt (BlpI)</i>                 |
| p112 | <i>pCloneHyg1-cka1-as1 (F117G, BlpI)</i>         |
| p113 | <i>pCloneHyg1-cka1-as2 (F117A, BlpI)</i>         |

---

|      |                                                  |
|------|--------------------------------------------------|
| p114 | <i>pCloneNat1-<math>\Delta</math>crk1 (XbaI)</i> |
| p115 | <i>pCloneHyg1-crk1-wt (XcmI)</i>                 |
| p116 | <i>pCloneHyg1-crk1-as1 (L87G, XcmI)</i>          |
| p117 | <i>pCloneHyg1-crk1-as2 (L87A, XcmI)</i>          |

---

|      |                                                  |
|------|--------------------------------------------------|
| p118 | <i>pCloneNat1-<math>\Delta</math>hsk1 (XbaI)</i> |
| p119 | <i>pCloneHyg1-hsk1-wt (AccI)</i>                 |
| p120 | <i>pCloneHyg1-hsk1-as1 (L173G, AccI)</i>         |
| p121 | <i>pCloneHyg1-hsk1-as2 (L173A, AccI)</i>         |

---

p122 *pCloneNat1- $\Delta$ ksg1 (XbaI)*

p123 *pCloneHyg1-ksg1-wt (AfeI)*

p124 *pCloneHyg1-ksg1-as1 (L177G, AfeI)*

---

p125 *pCloneNat1- $\Delta$ nak1 (XbaI)*

p126 *pCloneHyg1-nak1-wt (BsiWI)*

p127 *pCloneHyg1-nak1-as1 (M88G, BsiWI)*

p128 *pCloneHyg1-nak1-as2 (M88A, BsiWI)*

---

p129 *pCloneNat1- $\Delta$ orb6 (XbaI)*

p130 *pCloneHyg1-orb6-wt (SwaI)*

p131 *pCloneHyg1-orb6-as1 (M170G, SwaI)*

---

p132 *pCloneNat1- $\Delta$ pat1 (XbaI)*

p133 *pCloneHyg1-pat1-wt (PpuMI)*

p134 *pCloneHyg1-pat1-as1 (L95G, PpuMI)*

p135 *pCloneHyg1-pat1-as2 (L95A, PpuMI)*

---

p136 *pCloneNat1- $\Delta$ plo1 (XbaI)*

p137 *pCloneHyg1-plo1-wt (BclI)*

p138 *pCloneHyg1-plo1-as1 (L117G, BclI)*

---

p139 *pCloneNat1- $\Delta$ ppk37 (XbaI)*

p140 *pCloneHyg1-ppk37-wt (XcmI)*

p141 *pCloneHyg1-ppk37-as1 (M537G, XcmI)*

p142 *pCloneHyg1-ppk37-as2 (M537A, XcmI)*

---

p143 *pCloneNat1- $\Delta$ prp4 (XbaI)*

p144 *pCloneHyg1-prp4-wt (SfuI)*

|       |                                                  |
|-------|--------------------------------------------------|
| p145  | <i>pCloneHyg1-prp4-as1 (F238G, SfuI)</i>         |
| p146  | <i>pCloneHyg1-prp4-as2 (F238A, SfuI)</i>         |
| <hr/> |                                                  |
| p147  | <i>pCloneNat1-<math>\Delta</math>shk1 (XbaI)</i> |
| p148  | <i>pCloneHyg1-shk1-wt (Bst1107I)</i>             |
| p149  | <i>pCloneHyg1-shk1-as1 (M460G, Bst1107I)</i>     |
| p150  | <i>pCloneHyg1-shk1-as2 (M460A, Bst1107I)</i>     |
| <hr/> |                                                  |
| p151  | <i>pCloneNat1-<math>\Delta</math>sid1 (NheI)</i> |
| p152  | <i>pCloneHyg1-sid1-wt (PaeI)</i>                 |
| p153  | <i>pCloneHyg1-sid1-as1 (M84G, PaeI)</i>          |
| p154  | <i>pCloneHyg1-sid1-as2 (M84A, PaeI)</i>          |
| <hr/> |                                                  |
| p155  | <i>pCloneNat1-<math>\Delta</math>sid2 (XbaI)</i> |
| p156  | <i>pCloneHyg1-sid2-wt (BsaBI)</i>                |
| p157  | <i>pCloneHyg1-sid2-as1 (M285G, BsaBI)</i>        |
| p158  | <i>pCloneHyg1-sid2-as2 (M285A, BsaBI)</i>        |

*Note:* restriction enzymes to linearize the plasmids and corresponding gate-keeper residues are listed.

**Table S3.** Primers used to create integrative plasmids bearing mutant kinase alleles.

|             |                         |                                                                               |
|-------------|-------------------------|-------------------------------------------------------------------------------|
| <i>cdc2</i> | cdc2-promotor           | atatc <u>tcgaga</u> agtctttgacagttttacaatt                                    |
|             | cdc2-terminator         | atat <u>ggatcct</u> gcttttgtaaaaagaacgg                                       |
|             | cdc2-sense (F84G)       | gctgaatcaaagttgatcttgtt <u>ggg</u> agtttttagacatgg                            |
|             | cdc2-anti-sense (F84G)  | ccatgtctaaaaact <u>cccca</u> acaagatacaactttgattcagc                          |
| <i>cdc7</i> | cdc7-promotor           | atata <u>tcgag</u> agctctatcctatttcaaaaacgac                                  |
|             | cdc7-terminator         | atata <u>ggatc</u> caaagcagcaaattaatagcc                                      |
|             | cdc7-sense (L85G)       | ttatcagacgaacgattctctatgcattatt <u>ggg</u> gagtagctgatttc                     |
|             | cdc7-anti-sense (L85G)  | gaaaatcacgtact <u>ccca</u> ataatgcatagagaatcggtcgtctgata                      |
|             | cdc7-sense (L85A)       | ttatcagacgaacgattctctatgcattatt <u>gcg</u> gagtagctgatttc                     |
|             | cdc7-anti-sense (L85A)  | gaaaatcacgtact <u>ccg</u> caataatgcatagagaatcggtcgtctgata                     |
| <i>cdk9</i> | cdk9-promotor           | atatt <u>gtac</u> attgttcccgcgatgtaaaacatg                                    |
|             | cdk9-terminator         | atat <u>ggatc</u> ctgactctgttttggatgacg                                       |
|             | cdk9-sense (T120G)      | gtcgtggttctatatataggt <u>ggg</u> tccctatatggatcatgaccttt                      |
|             | cdk9-anti-sense (T120G) | aaaggtcatgatccatataagg <u>acc</u> ccatataatagaccacgac                         |
| <i>cka1</i> | cka1-promotor           | atatc <u>tcgag</u> gcgataataatattattacaataactcg                               |
|             | cka1-terminator         | atat <u>ggatc</u> cctaagggtgctctctaattaaggct                                  |
|             | cka1-sense (F117G)      | cgataactaatattttatagagtaaaacaccatctttaatt <u>ggg</u> gaatttggtgacaatattgatttc |
|             | cka1-anti-sense (F117G) | gaaatcaatattgtcaacaaatt <u>ccca</u> aataaagatggtgtttactctataaaatattagtatcg    |
|             | cka1-sense (F117A)      | cgataactaatattttatagagtaaaacaccatctttaatt <u>gcg</u> gaatttggtgacaatattgatttc |
|             | cka1-anti-sense (F117A) | gaaatcaatattgtcaacaaatt <u>ccg</u> caataaagatggtgtttactctataaaatattagtatcg    |
| <i>crk1</i> | crk1-ATG                | atatc <u>tcgag</u> caagtgacgtatgtgaagg                                        |
|             | crk1-terminator         | atat <u>ggatc</u> cagatgaaaataagagtgtcc                                       |



|                        |                                                   |
|------------------------|---------------------------------------------------|
| crk1-sense (L87G)      | gtccaacctcaacatcatc <b>ggg</b> gaattcctggacagtgat |
| crk1-anti-sense (L87G) | atcactgtccaggaatt <b>ccc</b> gatgatggtgaggttgac   |
| crk1-sense (L87A)      | gtccaacctcaacatcatc <b>cg</b> gaattcctggacagtgat  |
| crk1-anti-sense (L87A) | atcactgtccaggaatt <b>cgc</b> gatgatggtgaggttgac   |

---

|                           |                                                      |
|---------------------------|------------------------------------------------------|
| <b>hsk1</b> hsk1-promotor | atatg <b>tcgac</b> gacatgaaatcttaatcttttccat         |
| hsk1-terminator           | atatagatcttaaggttttgggtaagggtc                       |
| hsk1-sense (L173G)        | atgaagatcaggtagctgtagt <b>gg</b> accctactacgagcatac  |
| hsk1-anti-sense (L173G)   | gtatgctcgtagtagg <b>gtcca</b> actacgagtacctgatcttcat |
| hsk1-sense (L173A)        | atgaagatcaggtagctgtagt <b>gc</b> accctactacgagcatac  |
| hsk1-anti-sense (L173A)   | gtatgctcgtagtagg <b>gtgca</b> actacgagtacctgatcttcat |

---

|                           |                                                           |
|---------------------------|-----------------------------------------------------------|
| <b>ksg1</b> ksg1-promotor | atatg <b>tcgac</b> gaaaataacttggttgacaa                   |
| ksg1-terminator           | atatagatctgtaaccacccttagtatgca                            |
| ksg1-sense (L177G)        | ctttccaagatgctcacaatttgatgtt <b>ggg</b> agtcttgctcgaatg   |
| ksg1-anti-sense (L177G)   | catttcgagcaagact <b>cca</b> acaaaatacaaatgtgagcatcttggaag |

---

|                        |                                                                  |
|------------------------|------------------------------------------------------------------|
| <b>nak1</b> nak1-ATG   | atatg <b>tcgac</b> gaaaataaactgcttcttcg                          |
| nak1-terminator        | atatagatctc <b>gac</b> gggttgatgctttg                            |
| nak1-sense (M88G)      | gctcttatttgtaggtactaatttatggattatag <b>ggg</b> attattgcatggaggt  |
| nak1-anti-sense (M88G) | acctccatgacaataat <b>ccct</b> tataatccataaattagtagctaccaataagagc |
| nak1-sense (M88A)      | gctcttatttgtaggtactaatttatggattatag <b>cg</b> attattgcatggaggt   |
| nak1-anti-sense (M88A) | acctccatgacaataat <b>cgc</b> tataatccataaattagtagctaccaataagagc  |

---

|                           |                                                             |
|---------------------------|-------------------------------------------------------------|
| <b>orb6</b> orb6-promotor | atatg <b>tcgac</b> gtgaaattgtcaacgttttgcc                   |
| orb6-terminator           | atatagatctggtgagttttacaagccaatg                             |
| orb6-sense (M170G)        | gctttcaagattcactgtatctttacttgatt <b>ggg</b> gagttttaccaggcg |

|                     |                          |                                                                        |
|---------------------|--------------------------|------------------------------------------------------------------------|
|                     | orb6-anti-sense (M170G)  | cgcttggtaaaaact <b>ccca</b> atcaagtaaagatacagtgatcttgaaaagc            |
| <b><i>pat1</i></b>  | pat1-promotor            | atatctc <b>gagc</b> gattgtgttccttctcatcc                               |
|                     | pat1-terminator          | atat <b>ggatcc</b> ggtgatacaaatgactgcatgc                              |
|                     | pat1-sense (L95G)        | aagacgccatttatgtcgtt <b>ggcc</b> agattgtccgaatgg                       |
|                     | pat1-anti-sense (L95G)   | ccattcggacaatact <b>ggcca</b> acgacataaatggcgtctt                      |
|                     | pat1-sense (L95A)        | aagacgccatttatgtcgtt <b>ggcc</b> agattgtccgaatgg                       |
|                     | pat1-anti-sense (L95A)   | ccattcggacaatact <b>gggca</b> acgacataaatggcgtctt                      |
| <b><i>plol</i></b>  | plol- promotor           | atatctc <b>gag</b> ttaggggaacttctgaca                                  |
|                     | plol-terminator          | atat <b>ggatcc</b> ggaattagttataagtactttaaagca                         |
|                     | plol-sense (L117G)       | ttatagattgtttgaagattcgcgaatattacttaatt <b>ggg</b> gagctttgtgaacataaatc |
|                     | plol-anti-sense (L117G)  | gatttatgttcacaaagct <b>ccca</b> attaagtaaatctcgaatctcaaaacaatctataa    |
| <b><i>ppk37</i></b> | ppk37-promotor           | atatctc <b>gag</b> attccgtaggtaaattgcctcc                              |
|                     | ppk37-terminator         | atat <b>ggatc</b> ctatctgaacacatcggctcagc                              |
|                     | ppk37-sense (M537G)      | gacacgtggtgcgctgtt <b>ggg</b> gacttttgtccaga                           |
|                     | ppk37-anti-sense (M537G) | tctgggacaaaagt <b>ccca</b> acagcgcaccacgtgtc                           |
|                     | ppk37-sense (M537A)      | gacacgtggtgcgctgtt <b>ggg</b> gacttttgtccaga                           |
|                     | ppk37-anti-sense (M537A) | tctgggacaaaagt <b>cgca</b> acagcgcaccacgtgtc                           |
| <b><i>prp4</i></b>  | prp4-promotor            | atatctc <b>gag</b> atccattttaataatcctcgc                               |
|                     | prp4-terminator          | atat <b>ccggg</b> aatggtaactttgaataccgc                                |
|                     | prp4-sense (F238G)       | gcacaaaaatcatctttgcatggt <b>ggg</b> tgagatgtaagtcttaatcttcgg           |
|                     | prp4-anti-sense (F238G)  | ccgaagattaagacttaacatctc <b>acc</b> caccatgcaaagatgattttgtgc           |
|                     | prp4-sense (F238A)       | gcacaaaaatcatctttgcatggt <b>ggc</b> tgagatgtaagtcttaatcttcgg           |
|                     | prp4-anti-sense (F238A)  | ccgaagattaagacttaacatctc <b>agc</b> caccatgcaaagatgattttgtgc           |

|             |                         |                                                     |
|-------------|-------------------------|-----------------------------------------------------|
| <b>shk1</b> | shk1-promotor           | atata <u>agctt</u> cctaactgattagtgaaattaatataagat   |
|             | shk1-terminator         | atag <u>gatcctt</u> ccttttagtttttataatgca           |
|             | shk1-sense (M460G)      | taaatcagagttgtggatggtag <u>ggg</u> gaatacatgcgcggtg |
|             | shk1-anti-sense (M460G) | caccgcgatgtattc <u>ccct</u> accatccacaactctgattta   |
|             | shk1-sense (M460A)      | taaatcagagttgtggatggtag <u>cg</u> gaatacatgcgcggtg  |
|             | shk1-anti-sense (M460A) | caccgcgatgtattc <u>cgct</u> accatccacaactctgattta   |

---

|             |                        |                                                     |
|-------------|------------------------|-----------------------------------------------------|
| <b>sid1</b> | sid1-promotor          | atat <u>ctcgag</u> agtagattgccaattaaattg            |
|             | sid1-terminator        | atag <u>gatcca</u> acttacaagtacgacgttca             |
|             | sid1-sense (M84G)      | cggatacacattatggatttt <u>gggg</u> gagcatatggatggagg |
|             | sid1-anti-sense (M84G) | cctccatccatagctc <u>cccc</u> aaaatccataatgtgtatccg  |
|             | sid1-sense (M84A)      | cggatacacattatggatttt <u>ggcg</u> gagcatatggatggagg |
|             | sid1-anti-sense (M84A) | cctccatccatagctc <u>cg</u> ccaaaatccataatgtgtatccg  |

---

|             |                         |                                                           |
|-------------|-------------------------|-----------------------------------------------------------|
| <b>sid2</b> | sid2-ATG                | atat <u>ctcgag</u> atatgtcaccagttgaagg                    |
|             | sid2-terminator         | atatt <u>gtacatt</u> gcagatagtgctatttcc                   |
|             | sid2-sense (M285G)      | ttcaggatacttcaaacatttatctcgct <u>ggg</u> gaattgttctctggtg |
|             | sid2-anti-sense (M285G) | caccaggaacaaatt <u>cccc</u> agcgagataaatgtttgaagtatcctgaa |
|             | sid2-sense (M285A)      | ttcaggatacttcaaacatttatctcgct <u>cg</u> gaattgttctctggtg  |
|             | sid2-anti-sense (M285A) | caccaggaacaaattc <u>cg</u> cagcgagataaatgtttgaagtatcctgaa |

---
